# Supplementary material
Source: PubMed Central journal article supplement (PMC7953865)
Supplement: NIHMS1543090-supplement-1.pdf [file NIHMS1543090-supplement-1.pdf]

## **SUPPLEMENTAL MATERIAL**

### **LH Acute Sample:**

“Um I see a little boy standin’ on the chair trying to grab the cookie jar. It’s falling backwards. Chair is falling. Um I guess it’s his sister is standin’ there with her hand up waitin’ for him to pass her some cookies, and I see them mom standin’ at the sink with the water turned on. Water is overflowing and she’s drying dishes. I need more?”

### **LH Chronic Sample:**

“It has a girl is reaching for a cookie. She is also worried about the pen, and he doesn't care about the guys in the cookie jar because he's pulling the coo-cookies down to give to her. N’ the mother is standing in a puddle of puddle water, which is pouring down. And she's drying the dish. And she's looking outside. And she's not really paying attention to all the water dripping down. And she has some tea right there that she would like to give to people, but she's not thinking about that because she's just looking outside. So, this is kind of a mess. That's about it I think.”

### **RH Acute Sample:**

“Ok June Cleaver lost her pearls, but she’s still washing dishes. The Beaver is falling off a chair and some little girl who he doesn’t really like is fall - is watching him - trying to get cookies from him. Beaver is up on the chair trying to steal cookies from the cookies jar. June Cleaver is not really paying attention. Sh- the sink is overflowing, and she is just standing in a puddle of water trying to drying dishes - washing - drying dishes. And June’s pearls are nowhere to be found.”

### **RH Chronic Sample:**

“There’s a woman in the picture who’s cleaning up the dishes. There are dishes and a curtain or a drape. I don’t know which. There are cabinets on the bottom of the - of the counter. This counter I’ll call it. There’s a light. It’s daytime. There’s a hanger hanging in the window. It’s daytime because it’s light outside. There are handles on the cabinets below the counter. There are also curtains on the window. And I don’t know if this a light or what. But there are plates up on the counter also and two bowls and several plates, I can’t count them. Certainly 4 or 5 - 3 or 4 and another couple bowls and a sink and a faucet over the sink and a water spray beside the faucet. And you can move it from left to right - the arm of the faucet - it seems. And there’s a woman who is now cleaning the plate. She actually looks like she’s smiling. Maybe she likes doing dishes. Now I see some more plates, maybe four more and more bowls. And on the floor, there’s something. I don’t know, it looks like something spilled over from the - from the sink onto the floor.”
